# Supplementary material for: Mining Significant Substructure Pairs for Interpreting Polypharmacology in Drug-Target Network
Source: PLOS journal article supplement (doi:10.1371/journal.pone.0016999), 2011-02-23
Supplement: S4 (10.1371/journal.pone.0016999.s004) [file journal.pone.0016999.s004]

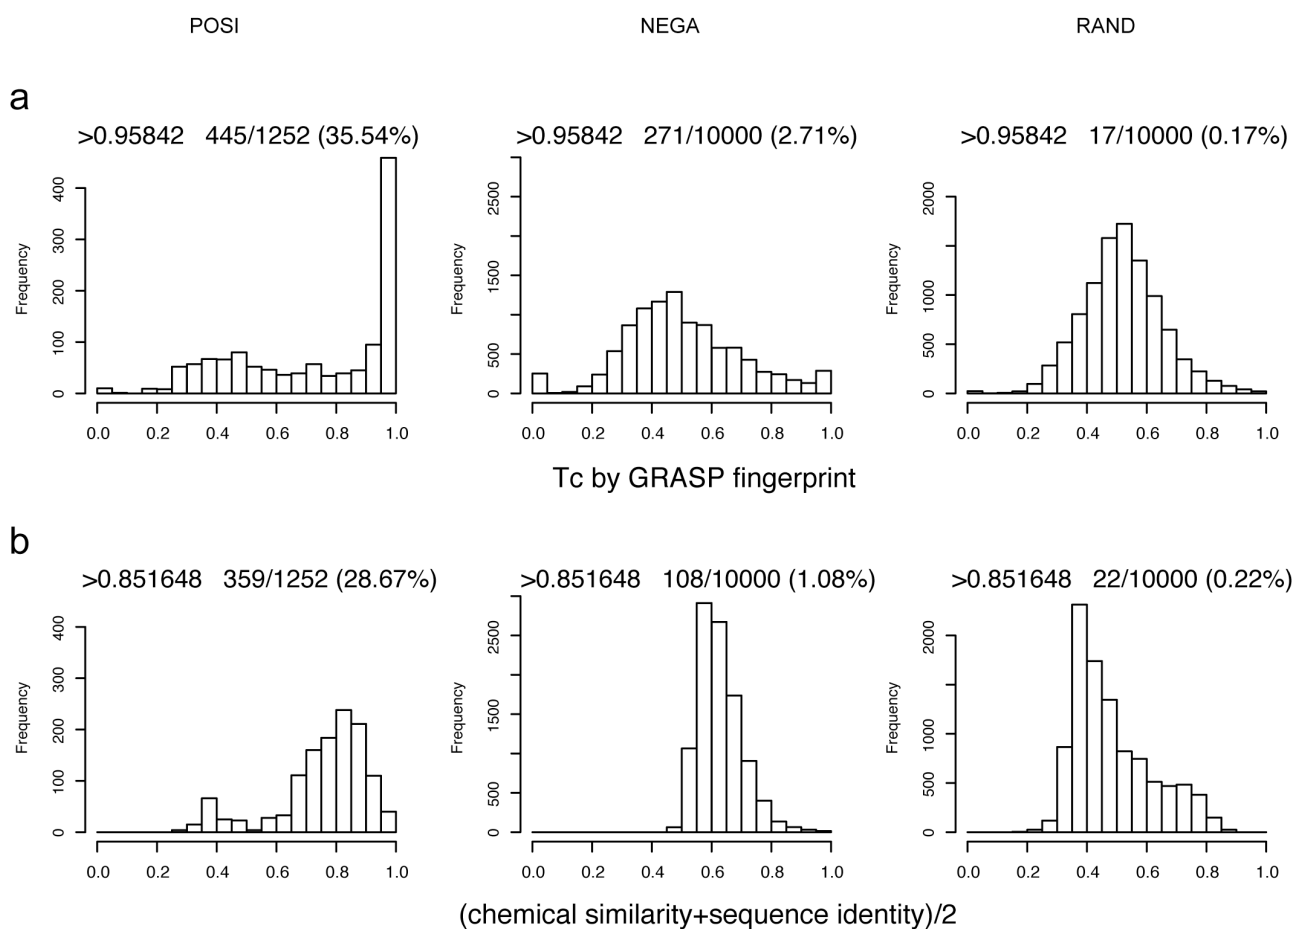

**Figure S4:** (a) Distributions of highest Tc of compound-protein pairs in POSI, NEGA and RAND, when the Tc was computed between the GRASP fingerprints of two pairs. (b) Distributions of highest similarities of compound-protein pairs in POSI, NEGA and RAND, when the similarity is given by compound similarity plus sequence identity.
