# Supplementary material for: Mining Significant Substructure Pairs for Interpreting Polypharmacology in Drug-Target Network
Source: PLOS journal article supplement (doi:10.1371/journal.pone.0016999), 2011-02-23
Supplement: S6 (10.1371/journal.pone.0016999.s006) [file journal.pone.0016999.s006]

**Table S1:** For each of R1 to R8, (a) the number of drug-target pairs, (b) the number of drug-target pairs which gave the highest Tc of larger than 0.95 for pairs in POSI and (c) the number of drug-target pairs which gave the highest Tc of larger than 0.95 for pairs in MASS.

|                                                    | R1               | R2                | R3                  | R4              | R5              | R6              | R7                  | R8                | other             | Total               |
|----------------------------------------------------|------------------|-------------------|---------------------|-----------------|-----------------|-----------------|---------------------|-------------------|-------------------|---------------------|
| #drug-target pairs                                 | 283<br>(2.52%)   | 287<br>(2.56%)    | 1,848<br>(16.47%)   | 180<br>(1.60%)  | 555<br>(4.95%)  | 465<br>(4.14%)  | 222<br>(1.98%)      | 741<br>(6.60%)    | 6,638<br>(59.17%) | 11,219<br>(100%)    |
| #drug-target pairs with highest Tc > 0.95 for POSI | 17<br>(7.30%)    | 6 (2.58%)         | 3 (1.29%)           | 2 (0.86%)       | 7 (3.00%)       | 11<br>(4.72%)   | 0 (0%)              | 40<br>(17.17%)    | 147<br>(63.09%)   | 233<br>(100%)       |
| #drug-target pairs with highest Tc > 0.95 for MASS | 9,865<br>(0.85%) | 29,696<br>(2.56%) | 928,957<br>(79.97%) | 186<br>(0.016%) | 129<br>(0.011%) | 134<br>(0.012%) | 147,531<br>(12.70%) | 10,874<br>(0.93%) | 34,241<br>(2.95%) | 1,161,613<br>(100%) |
