# Supplementary material for: Mining Significant Substructure Pairs for Interpreting Polypharmacology in Drug-Target Network
Source: PLOS journal article supplement (doi:10.1371/journal.pone.0016999), 2011-02-23
Supplement: S12 (10.1371/journal.pone.0016999.s012) [file journal.pone.0016999.s012]

**Table S7:** In each of R1 to R8, given drugs and targets of drug-target pairs (of promiscuous drugs), the ratio of drug-target pairs which were in the corresponding cluster to all drug-target pairs between them, and the average over those of  $10^5$  clusters, each having drug-target pairs (of promiscuous drugs) randomly selected out of the original 11,219 drug-target interactions and keeping the cluster size the same as that of the corresponding cluster.

| Cluster                                         | R1                | R2                  | R3                    | R4                  | R5                  | R6                  | R7                | R8                  |
|-------------------------------------------------|-------------------|---------------------|-----------------------|---------------------|---------------------|---------------------|-------------------|---------------------|
| Ratio                                           | 1.00<br>(205/205) | 0.9153<br>(216/236) | 0.9932<br>(1451/1461) | 0.9655<br>(140/145) | 0.9621<br>(508/528) | 0.9790<br>(419/428) | 1.00<br>(176/176) | 0.9920<br>(621/626) |
| Average ratio by $10^5$<br>random clusters (RC) | 0.5679            | 0.5664              | 0.4986                | 0.6185              | 0.5127              | 0.5245              | 0.5938            | 0.4976              |
| Standard deviation of RC                        | 0.0536            | 0.0533              | 0.0146                | 0.0696              | 0.0349              | 0.0392              | 0.0617            | 0.0286              |
| Max of RC                                       | 0.68              | 0.678               | 0.532                 | 0.788               | 0.594               | 0.614               | 0.735             | 0.560               |
